# Supplementary material for: Observation of host cell morphological changes under simulated-microgravity conditions
Source: Research Square preprint supplement (doi:10.21203/rs.3.rs-6810961/v1), 2025-10-30
Supplement: Supplementary file 1 [file 7640d332fa218a09aa51b857.xlsx]

## Sheet: Volcano plot_up regulated
Genes in Volcano plot: upregulated
	Gene ID	Gene Symbol	Type	log2 (Microgravity / Normal gravity)	Qvalue (Microgravity / Normal gravity)	-log10Qvalue (Microgravity / Normal gravity)
	103223748	TMEM151A'	mRNA	2.25247	0.023328	1.63212
	103220050	NAT8'	mRNA	2.07461	0.0101075	1.99535
	103214418	'ISM1'	mRNA	1.81571	9.96795e-06	5.00139
	103238487	'GDF11'	mRNA	1.54845	0.00537446	2.26967
	103238826	'KITLG'	mRNA	1.45574	1.24018e-06	5.90652
	103229383	'ZDHHC22'	mRNA	1.42872	9.38258e-07	6.02768
	103247167	'HIST2H2BE'	mRNA	1.40773	2.23954e-05	4.64984
	103232448	'CLDN2'	mRNA	1.37454	9.0321e-13	12.0442
	103227682	'CISH'	mRNA	1.31976	0.0212396	1.67285
	103243404	'HSD17B1'	mRNA	1.18199	0.00252407	2.5979
	103224900	'PIK3R3'	mRNA	1.1561	0.0025318	2.59657
	103229897	'GCH1'	mRNA	1.13372	0.0175305	1.75621
	103216928	'TMEM37'	mRNA	1.07343	0.000579729	3.23677
	103225436	'ALPL'	mRNA	1.06625	3.95249e-05	4.40313
	103225025	'RIMS3'	mRNA	1.06523	3.38829e-07	6.47002
	103244800	'RBM22'	mRNA	1.03795	0.00205815	2.68652
	103233079	'MMP15'	mRNA	1.02371	0.00575871	2.23967
	103244351	'LOC103244351'	mRNA	1.00263	0.00605253	2.21806

## Sheet: Volcano plot_down regulated
Volcano plot: downregulated
	Gene ID	Gene Symbol	Type	log2 (Microgravity / Normal gravity)	Qvalue (Microgravity / Normal gravity)	-log10Qvalue (Microgravity / Normal gravity)
	103240389	'ADM'	mRNA	-4.22458	5.54749e-05	4.2559
	103226860	'HILPDA'	mRNA	-3.47253	1.84383e-32	31.7343
	103236623	ANKRD37'	mRNA	-2.87676	0.0292062	1.53452
	103244411	'LOX'	mRNA	-2.80377	8.28917e-09	8.08149
	103223291	'LOC103223291'	mRNA	-2.77018	0.00142881	2.84503
	119626144	'LOC119626144'	mRNA	-2.69519	0.0179676	1.74551
	103218518	'SLC2A3'	mRNA	-2.53764	0.0262265	1.58126
	103215488	'STC1'	mRNA	-2.52663	2.0785e-07	6.68225
	103238055	'BAMBI'	mRNA	-2.51813	5.4442e-15	14.2641
	103237471	'CCN4'	mRNA	-2.50954	5.54749e-05	4.2559
	103243363	'ARL4D'	mRNA	-2.49129	9.87998e-09	8.00524
	103236625	'LOC103236625'	mRNA	-2.48185	0.000848011	3.0716
	103226390	'IL6'	mRNA	-2.34334	2.29203e-13	12.6398
	103225114	'SH3D21'	mRNA	-2.32667	1.99865e-09	8.69926
	103223884	FAM189B'	mRNA	-2.29239	3.85573e-17	16.4139
	103216995	'CXCR4'	mRNA	-2.28617	0.00968589	2.01386
	103235429	'SLC43A3'	mRNA	-2.27605	0.000420691	3.37604
	103229609	SERPINA1'	mRNA	-2.22994	1.40092e-17	16.8536
	103241420	'PTX3'	mRNA	-2.20518	0.00621085	2.20685
	103215210	'NIM1K'	mRNA	-2.17047	5.81996e-09	8.23508
	103246069	'LOC103246069'	mRNA	-2.10691	0.00024415	3.61234
	103216726	'BNIP3'	mRNA	-2.02292	0.0429859	1.36667
	103224405	'F3'	mRNA	-2.00298	2.06457e-05	4.68517
	103232782	'BGN'	mRNA	-1.90592	0.00805623	2.09387
	103237466	'SLA'	mRNA	-1.88396	0.036275	1.44039
	103227591	PFKFB4'	mRNA	-1.87904	3.85573e-17	16.4139
	119623675	'LOC119623675'	mRNA	-1.86298	5.87462e-10	9.23102
	103247134	'MYEOV'	mRNA	-1.83283	0.00310507	2.50793
	119622100	'LOC119622100'	mRNA	-1.80025	2.99861e-05	4.52308
	103222951	'TMEM191C'	mRNA	-1.77905	0.00201373	2.696
	103216026	'DDIT4'	mRNA	-1.70407	5.09979e-10	9.29245
	103215654	'PLEKHA2'	mRNA	-1.70321	1.89338e-14	13.7228
	103237472	'NDRG1'	mRNA	-1.70214	8.09407e-20	19.0918
	103225007	'RIMKLA'	mRNA	-1.67732	6.96657e-07	6.15698
	103217325	'PDK1'	mRNA	-1.67137	9.99588e-06	5.00018
	103231467	'PPP1R3E'	mRNA	-1.63255	4.41191e-12	11.3554
	103227515	'TMEM158'	mRNA	-1.59206	0.00223461	2.6508
	103241279	'IL1A'	mRNA	-1.54416	2.21539e-07	6.65455
	103220012	'HK2'	mRNA	-1.54234	9.06276e-09	8.04274
	103241263	'FBLN7'	mRNA	-1.52798	6.32436e-10	9.19898
	103221707	'GPSM3'	mRNA	-1.51402	0.00186171	2.73009
	103236220	'SPRY1'	mRNA	-1.49982	0.000561938	3.25031
	103228187	'FAM162A'	mRNA	-1.47262	2.7008e-08	7.56851
	103245509	'CA12'	mRNA	-1.46959	8.88179e-16	15.0515
	103218486	'ENO2'	mRNA	-1.43693	6.75558e-13	12.1703
	103243759	'SLC16A3'	mRNA	-1.43047	2.02237e-08	7.69414
	103237469	'TG'	mRNA	-1.40296	2.06457e-05	4.68517
	103235009	'GYS1'	mRNA	-1.38918	5.91353e-10	9.22815
	103232238	'PGK1'	mRNA	-1.38235	1.68787e-08	7.77266
	103219924	'KDM3A'	mRNA	-1.36464	1.02264e-08	7.99028
	103245283	'WFDC3'	mRNA	-1.35869	0.0240911	1.61814
	103218483	'TPI1'	mRNA	-1.35769	1.028e-06	5.98801
	119622443	'LOC119622443'	mRNA	-1.34281	0.0467225	1.33047
	103235965	'FAM13A'	mRNA	-1.33736	0.000434111	3.3624
	103226169	'INHBA'	mRNA	-1.32207	3.79548e-05	4.42073
	103224675	'AK4'	mRNA	-1.31459	2.27296e-07	6.64341
	103229706	'RTL1'	mRNA	-1.30703	5.2916e-07	6.27641
	103218453	'GAPDH'	mRNA	-1.30151	5.2916e-07	6.27641
	103224987	'SLC2A1'	mRNA	-1.29039	1.01136e-08	7.99509
	103223830	'CRABP2'	mRNA	-1.284	1.64731e-09	8.78322
	103215511	'BNIP3L'	mRNA	-1.26221	1.50658e-05	4.82201
	103234470	'GPI'	mRNA	-1.26089	3.90589e-07	6.40828
	103237780	'LOC103237780'	mRNA	-1.26059	2.63423e-10	9.57935
	103216939	'INSIG2'	mRNA	-1.25985	1.09943e-05	4.95883
	103218045	'CUNH2orf72'	mRNA	-1.25386	0.00487504	2.31202
	103215469	'TNFRSF10B'	mRNA	-1.24245	3.29489e-05	4.48216
	103231499	'TICRR'	mRNA	-1.24038	0.00945851	2.02418
	103223166	'MTFP1'	mRNA	-1.23471	0.000229811	3.63863
	103234335	'PLIN3'	mRNA	-1.22745	4.37506e-08	7.35902
	103231929	'RBM3'	mRNA	-1.22479	3.61156e-11	10.4423
	103224814	'ORC1'	mRNA	-1.2066	0.00203165	2.69215
	103238766	'E2F7'	mRNA	-1.19058	0.0187619	1.72672
	103226629	'SEMA3A'	mRNA	-1.18788	0.00293683	2.53212
	103223309	'MAFF'	mRNA	-1.18138	0.000339065	3.46972
	103215558	'DUSP4'	mRNA	-1.15567	0.00657841	2.18188
	103223897	'EFNA3'	mRNA	-1.1354	0.010781	1.96734
	103238906	'ELK3'	mRNA	-1.1273	4.69522e-09	8.32834
	103244571	'LOC103244571'	mRNA	-1.12498	3.73652e-06	5.42753
	103215355	'PPP1R3B'	mRNA	-1.12417	0.000653162	3.18498
	103215461	'CUNH8orf58'	mRNA	-1.12022	0.000150944	3.82118
	103222245	'PPP1R3G'	mRNA	-1.11477	0.0156661	1.80504
	103220782	'LRATD1'	mRNA	-1.11254	0.0113022	1.94684
	103247185	'CIART'	mRNA	-1.11185	0.0102909	1.98754
	103227143	'TCAF2'	mRNA	-1.1109	0.00121759	2.9145
	103243568	'EPOP'	mRNA	-1.10971	0.00121759	2.9145
	103222238	'NRN1'	mRNA	-1.10436	0.0277314	1.55703
	103246888	'GPR146'	mRNA	-1.10288	0.0327806	1.48438
	103220522	'LTBP1'	mRNA	-1.09606	0.000602102	3.22033
	103224691	'LOC103224691'	mRNA	-1.09403	0.046759	1.33013
	103244100	'NETO1'	mRNA	-1.08703	0.00132857	2.87662
	103224690	'PGM1'	mRNA	-1.08605	5.25897e-05	4.2791
	103220577	'RBKS'	mRNA	-1.07861	0.00823233	2.08448
	103216007	'P4HA1'	mRNA	-1.06451	4.49035e-05	4.34772
	119625296	'LOC119625296'	mRNA	-1.05079	5.2916e-07	6.27641
	119618786	'LOC119618786'	mRNA	-1.04725	7.32813e-05	4.13501
	103216535	'HABP2'	mRNA	-1.04648	3.83308e-07	6.41645
	103220634	'DRC1'	mRNA	-1.04643	0.00799598	2.09713
	103241535	'PLOD2'	mRNA	-1.03796	2.52263e-05	4.59815
	103248028	'PPME1'	mRNA	-1.023	1.65661e-05	4.78078
	103219799	'PFKL'	mRNA	-1.01982	0.000305535	3.51494
	103217002	'LOC103217002'	mRNA	-1.01186	3.83308e-07	6.41645
	103225662	'ERRFI1'	mRNA	-1.00821	0.00281747	2.55014
	103234768	'TMEM145'	mRNA	-1.00729	0.0132867	1.87658
	103246072	'PKM'	mRNA	-1.00688	1.02422e-06	5.98961
	103228991	'ERO1A'	mRNA	-1.00546	5.2916e-07	6.27641
	103238771	'NAV3'	mRNA	-1.00541	0.0134319	1.87186

## Sheet: Cell proliferation
GO classification: Cell proliferation
	Gene ID	Gene Symbol	log2 (Microgravity / Normal gravity)	Qvalue (Microgravity / Normal gravity)	-log10Qvalue (Microgravity / Normal gravity)	Regulation
	103240389	ADM'	-4.22458	5.54748554326748E-5	4.2559	Down
	103226860	HILPDA'	-3.47253	1.84382862432644E-32	31.7343	Down
	103215488	STC1'	-2.52663	2.07849732638178E-7	6.68225	Down
	103238055	BAMBI'	-2.51813	5.44419674243454E-15	14.2641	Down
	103226390	IL6'	-2.34334	2.29203472768401E-13	12.6398	Down
	103224405	F3'	-2.00298	2.06456741774721E-5	4.68517	Down
	103237472	NDRG1'	-1.70214	8.094071133844331E-20	19.0918	Down
	103217325	PDK1'	-1.67137	9.99587920480346E-6	5.00018	Down
	103241279	IL1A'	-1.54416	2.21539473503692E-7	6.65455	Down
	103236220	SPRY1'	-1.49982	5.619377045351E-4	3.25031	Down
	103226169	INHBA'	-1.32207	3.79547982604628E-5	4.42073	Down
	103238766	E2F7'	-1.19058	0.0187619	1.72672	Down
	103238826	KITLG'	1.45574	1.24017874145467E-6	5.90652	Up
	103238487	GDF11'	1.54845	0.00537446	2.26967	UP

## Sheet: Immune system
GO classification: Immune system
	Gene ID	Gene Symbol	Type	log2 (Microgravity / Normal gravity)	Qvalue (Microgravity / Normal gravity)	-log10Qvalue (Microgravity / Normal gravity)	Regulation
	103244411	LOX'	mRNA	-2.80377	8.28917e-09	8.08149	Down
	103237471	CCN4'	mRNA	-2.50954	5.54749e-05	4.2559	Down
	103226390	'IL6'	mRNA	-2.34334	2.29203e-13	12.6398	Down
	103241420	PTX3'	mRNA	-2.20518	0.00621085	2.20685	Down
	103216726	BNIP3'	mRNA	-2.02292	0.0429859	1.36667	Down
	103216026	'DDIT4'	mRNA	-1.70407	5.09979e-10	9.29245	Down
	103237472	NDRG1'	mRNA	-1.70214	8.09407e-20	19.0918	Down
	103241279	'IL1A'	mRNA	-1.54416	2.21539e-07	6.65455	Down
	103221707	'GPSM3'	mRNA	-1.51402	0.00186171	2.73009	Down
	103226169	'INHBA'	mRNA	-1.32207	3.79548e-05	4.42073	Down
	103215511	'BNIP3L'	mRNA	-1.26221	1.50658e-05	4.82201	Down
	103234470	'GPI'	mRNA	-1.26089	3.90589e-07	6.40828	Down
	103229897	'GCH1'	mRNA	1.13372	0.0175305	1.75621	Up
	103247167	'HIST2H2BE'	mRNA	1.40773	2.23954e-05	4.64984	Up
	103238826	'KITLG'	mRNA	1.45574	1.24018e-06	5.90652	Up

## Sheet: Cell junction
GO Classification: Cell junction
	Gene ID	Gene Symbol	Type	log2 (Microgravity / Normal gravity)	Qvalue (Microgravity / Normal gravity)	-log10Qvalue (Microgravity / Normal gravity)	Regulation
	103216995	CXCR4'	mRNA	-2.28617	0.00968589	2.01386	Down
	103237472	NDRG1'	mRNA	-1.70214	8.09407e-20	19.0918	Down
	103232448	CLDN2'	mRNA	1.37454	9.0321e-13	12.0442	Up

## Sheet: Cell growth and death
KEGG pathway classification: cell growth and death
	Gene ID	Gene Symbol	Type	log2 (Microgravity / Normal gravity)	Qvalue (Microgravity / Normal gravity)	-log10Qvalue (Microgravity / Normal gravity)	Regulation
	103226390	'IL6'	mRNA	-2.34334	2.29203e-13	12.6398	Down
	103241279	IL1A'	mRNA	-1.54416	2.21539e-07	6.65455	Down
	103215469	TNFRSF10B'	mRNA	-1.24245	3.29489e-05	4.48216	Down
	103224814	ORC1'	mRNA	-1.2066	0.00203165	2.69215	Down
	103224900	PIK3R3'	mRNA	1.1561	0.0025318	2.59657	Up
